# Supplementary material for: Porous lantern-like MFI zeolites composed of 2D nanosheets for highly efficient visible light-driven photocatalysis
Source: Royal Society of Chemistry journal article supplement (doi:10.1039/c9cy02212k), 2019-12-11
Supplement: c9cy02212k1.pdf [file c9cy02212k1.pdf]

Supporting Information for

**Porous Lantern-Like MFI Zeolite Composed of 2D Nanosheets for Highly Efficient Visible-Light-Driven Photocatalysis**

Hui Liu <sup>a</sup>, Dang-guo Cheng <sup>a,b,\*</sup>, Fengqiu Chen <sup>a,b</sup>, Xiaoli Zhan <sup>a,b</sup>

*<sup>a</sup> Zhejiang Provincial Key Laboratory of Advanced Chemical Engineering Manufacture Technology, College of Chemical and Biological Engineering, Zhejiang University, 38 Zheda Road, Hangzhou 310027, China*

*<sup>b</sup> Institute of Zhejiang University-Quzhou, 78 Jiu Hua Boulevard North, Quzhou 324000, China*

**Corresponding Author (D. -G. Cheng)**

Email: dgcheng@zju.edu.cn, Tel.: +86 571 87953382; Fax: +86-571-87951227.

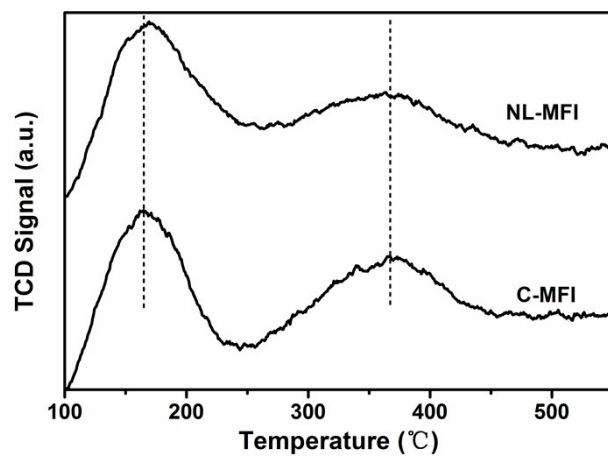

**Figure S1.** NH<sub>3</sub>-TPD curves of C-MFI and NL-MFI.

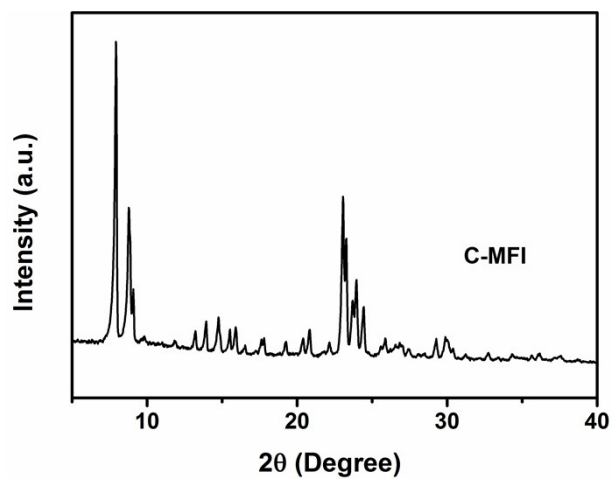

**Figure S2.** XRD pattern of C-MFI.

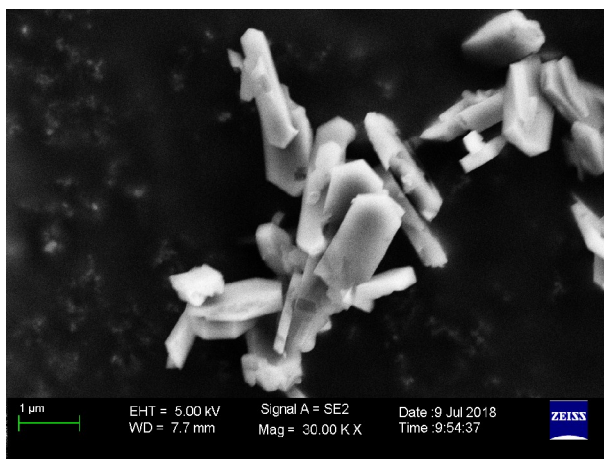

**Figure S3.** SEM image of C-MFI.

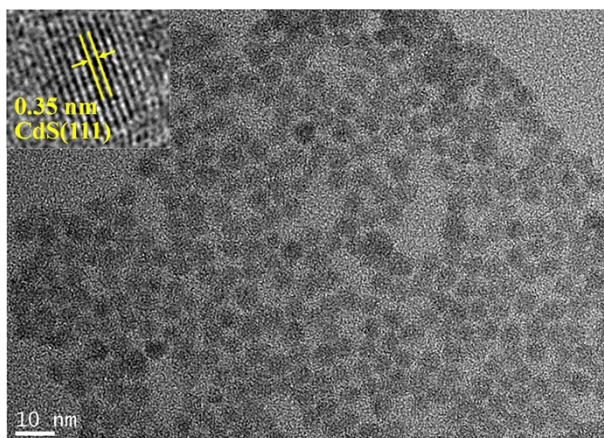

**Figure S4.** TEM image of the CdS nanoparticles.

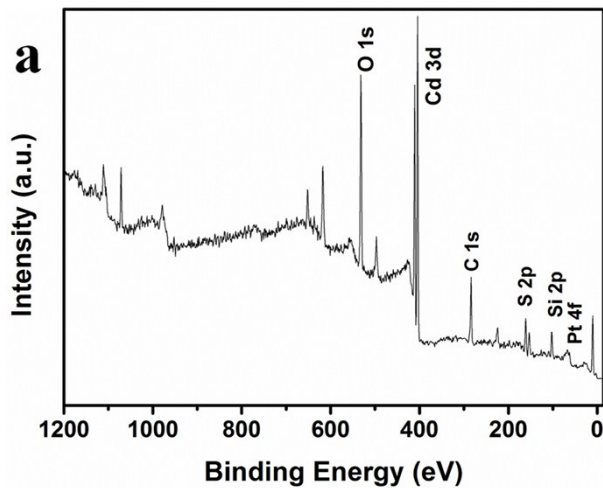

**Figure S5.** Full XPS spectrum of CdS/Pt/NL-MFI.

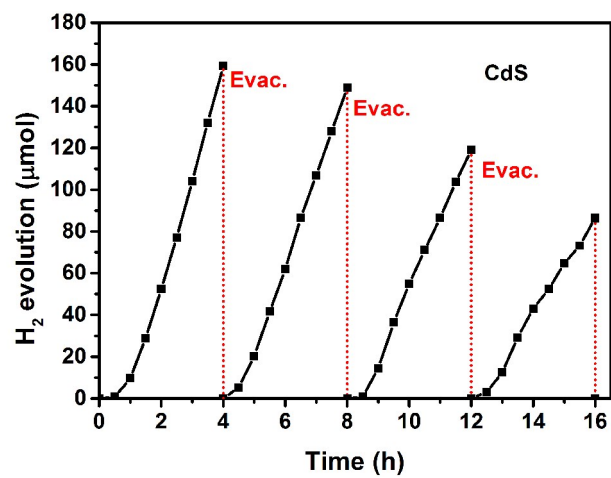

**Figure S6.** Photocatalytic stability of the pure CdS nanoparticles.

**Table S1.** ICP and NH<sub>3</sub>-TPD results of C-MFI and NL-MFI.

| Sample | Si/Al | Weak acid        |                                | Strong acid      |                                | Total acid amount (mmol·g <sup>-1</sup> ) |
|--------|-------|------------------|--------------------------------|------------------|--------------------------------|-------------------------------------------|
|        |       | Temperature (°C) | Amount (mmol·g <sup>-1</sup> ) | Temperature (°C) | Amount (mmol·g <sup>-1</sup> ) |                                           |
| C-MFI  | 50    | 166              | 0.16                           | 367              | 0.13                           | 0.29                                      |
| NL-MFI | 49    | 169              | 0.18                           | 364              | 0.12                           | 0.30                                      |



**Table S2.** Comparison of the photocatalytic H<sub>2</sub> evolution efficiency of CdS/Pt/NL-MFI with those of the CdS-based and zeolite-based photocatalysts reported in the literature.

| Photocatalyst                            | photocatalyst amount (mg);<br>Reaction solution (mL) | Sacrificial reagent                                                 | Light source                   | H <sub>2</sub> evolution rate (μmol/h) | QE (%);<br>wavelength (nm) | Ref.      |
|------------------------------------------|------------------------------------------------------|---------------------------------------------------------------------|--------------------------------|----------------------------------------|----------------------------|-----------|
| CdS/Pt/NL-MFI                            | 60; 100                                              | 20 vol%<br>Lactic acid                                              | 300 W Xe,<br>λ>420 nm          | 2152.7                                 | 39.4%<br>450 nm            | This work |
| CdS/Pt/Ga <sub>2</sub> O <sub>3</sub> -U | 100; 100                                             | 10 vol%<br>Lactic acid                                              | 300 W Xe,<br>λ>420 nm          | 995.8                                  | 43.6%<br>460 nm            | S1        |
| CdS/Pt/In <sub>2</sub> O <sub>3</sub> -U |                                                      |                                                                     |                                | 1032.2                                 | 45.3%<br>460 nm            |           |
| N-MoS <sub>2</sub> /CdS                  | 50; 100                                              | 10 vol%<br>Lactic acid                                              | 300 W Xe,<br>λ>420 nm          | ~456                                   |                            | S2        |
| Pd-CdS/ZSM-5                             | 600; 600                                             | 10 vol%<br>ethanol                                                  | 7 W UVC,<br>λ~254 nm           | ~668.8                                 |                            | S3        |
| MoS <sub>2</sub> /CdS-TiO <sub>2</sub>   | 20; 80                                               | 10 vol%<br>Lactic acid                                              | 300 W Xe,<br>λ>420 nm          | 280                                    | 19.3%<br>420 nm            | S4        |
| MoS <sub>2</sub> /CdS-P25                |                                                      |                                                                     |                                | 94.2                                   |                            |           |
| Pt/CdS-TiO <sub>2</sub>                  |                                                      |                                                                     |                                | 70                                     |                            |           |
| Pt -CdS/ZnO                              | 10; 25                                               | 0.25 M Na <sub>2</sub> S,<br>0.35 M Na <sub>2</sub> SO <sub>4</sub> | 225 W Xe arc,<br>λ: 420~720 nm | 221.2                                  |                            | S5        |
| CdS/WS <sub>2</sub> /graphene            | 8;8                                                  | 0.35 M Na <sub>2</sub> S,<br>0.25 M Na <sub>2</sub> SO <sub>3</sub> | 500 W Xe arc,<br>λ>420 nm      | ~14.7                                  | 21.2%<br>420 nm            | S6        |
| Pt/Zn <sub>0.5</sub> Cd <sub>0.5</sub> S | 30; 120                                              | 0.1 M Na <sub>2</sub> S,<br>0.1 M Na <sub>2</sub> SO <sub>3</sub>   | 500 W Xe arc,<br>λ>400 nm      | 114.3                                  | 7.15%                      | S7        |
|                                          |                                                      | 0.15 M<br>ascorbic acid                                             |                                | 164.9                                  | 8.56%                      |           |
| Pd@CdS/PdS                               | 10; 50                                               | 0.1 M Na <sub>2</sub> S,<br>0.1 M Na <sub>2</sub> SO <sub>3</sub>   | 300 W Xe,<br>λ>400 nm          | 892                                    |                            | S8        |
|                                          |                                                      | 0.5 M Na <sub>2</sub> S,<br>0.5 M Na <sub>2</sub> SO <sub>3</sub>   |                                | 1448                                   |                            |           |
| CdS/Pt/graphene                          | 20; 80                                               | 10 vol%<br>Lactic acid                                              | 350 W Xe arc,<br>λ>420 nm      | ~22.4                                  | 22.5%<br>420 nm            | S9        |

|                             |           |                                                                   |                                           |       |                 |     |
|-----------------------------|-----------|-------------------------------------------------------------------|-------------------------------------------|-------|-----------------|-----|
| CdS/Au/MoS <sub>2</sub>     | 10; 50    | 10 vol%<br>Lactic acid                                            | Xe arc,<br>$\lambda > 420$ nm             | ~70.1 | 27.9%           | S10 |
| Pd-Ti-MCM-48                | 2; 2      | 20 vol%<br>methanol                                               | 300 W Xe,<br>$\lambda > 280$ nm           | 560   |                 | S11 |
| Pt-TiO <sub>2</sub> /ZSM-5  | 100; 200  | 10 vol%<br>methanol                                               | 300 W Xe                                  | 1000  | 12.6%<br>365 nm | S12 |
| Pt-TiO <sub>2</sub> /SBA-15 |           |                                                                   |                                           | 880   | 5.4%<br>365 nm  |     |
| TiO <sub>2</sub> /Na-Y      | 100; 1000 | 5 vol%<br>ethanol                                                 | 100 W<br>high pressure<br>mercury lamp    | 25.1  |                 | S13 |
| Pd-CdPdS-NaY                | 50; 25    | 0.4 M Na <sub>2</sub> S,<br>0.3 M Na <sub>2</sub> SO <sub>3</sub> | 288 W<br>day light<br>fluorescent<br>lamp | ~116  |                 | S14 |

## References

- S1. Y. X. Pan, H. Zhuang, J. Hong, Z. Fang, H. Liu, B. Liu, Y. Huang and R. Xu, *ChemSusChem*, 2014, **7**, 2537-2544.
- S2. Q. Liu, X. Li, Q. He, A. Khalil, D. Liu, T. Xiang, X. Wu and L. Song, *Small*, 2015, **11**, 5556-5564.
- S3. H. Enzweiler, P. H. Yassue-Cordeiro, M. Schwaab, E. Barbosa-Coutinho, M. H. N. Olsen Scaliante and N. R. C. Fernandes, *Int. J. Hydrogen Energy*, 2018, **43**, 6515-6525.
- S4. N. Qin, J. Xiong, R. Liang, Y. Liu, S. Zhang, Y. Li, Z. Li and L. Wu, *Appl. Catal. B: Environ.*, 2017, **202**, 374-380.
- S5. D. Ma, J. W. Shi, Y. Zou, Z. Fan, X. Ji and C. Niu, *ACS Appl. Mater. Inter.*, 2017, **9**, 25377-25386.
- S6. Q. Xiang, F. Cheng and D. Lang, *ChemSusChem*, 2016, **9**, 996-1002.
- S7. B.-J. Ng, L. K. Putri, X. Y. Kong, K. P. Y. Shak, P. Pasbakhsh, S.-P. Chai and A. R. Mohamed, *Appl. Catal. B: Environ.*, 2018, **224**, 360-367.
- S8. R. Marschall and L. Wang, *Catal. Today*, 2014, **225**, 111-135.
- S9. Q. Li, B. Guo, J. Yu, J. Ran, B. Zhang, H. Yan and J. R. Gong, *J. Am. Chem. Soc.*, 2011, **133**, 10878-10884.
- S10. R. K. Chava, J. Y. Do and M. Kang, *ACS Sustain. Chem. Eng.*, 2018, **6**, 6445-6457.
- S11. R. Peng, J. Baltrusaitis, C.-M. Wu and R. T. Koodali, *Int. J. Hydrogen Energy*, 2015, **40**, 905-918.
- S12. C. Jiang, K. Y. Lee, C. M. A. Parlett, M. K. Bayazit, C. C. Lau, Q. Ruan, S. J. A. Moniz, A. F. Lee and J. Tang, *Appl. Catal. A: Gen.*, 2016, **521**, 133-139.
- S13. A. Taheri Najafabadi and F. Taghipour, *Energy Convers. Manage.*, 2014, **82**, 106-113.
- S14. R. Sasikala, A. P. Gaikwad, V. Sudarsan, R. Rao, J. Jagannath, B. Viswanadh and S. R. Bharadwaj, *PCCP*, 2015, **17**, 6896-6904.
